# Supplementary figures and images for: Syndecan-1 couples the insulin-like growth factor-1 receptor to inside-out integrin activation
Source: Oxford University Press journal article supplement (doi:10.1242/jcs.067645), 2010-10-22

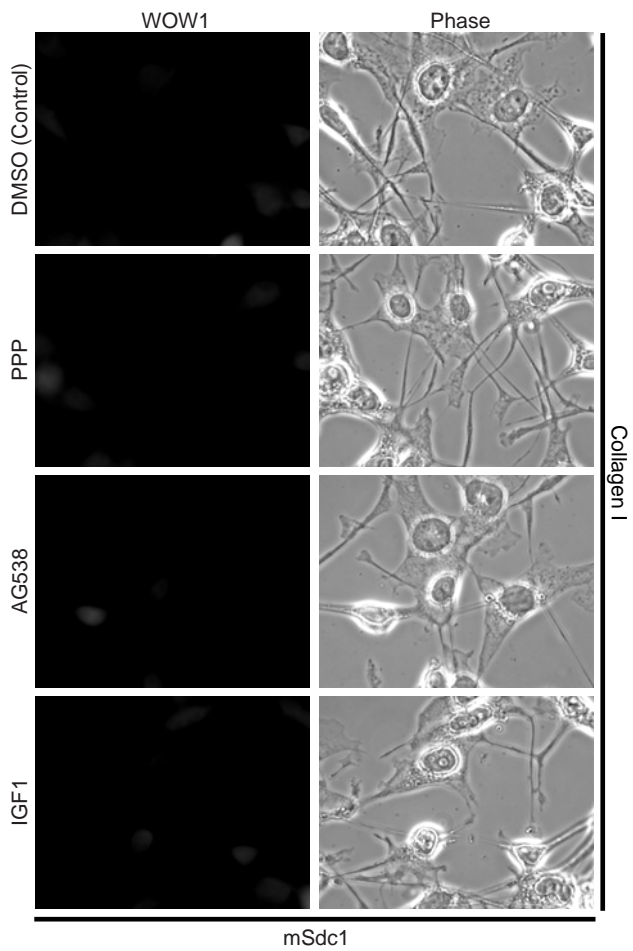

Supplement: jcs067645figs1.pdf [file jcs067645figs1.pdf]

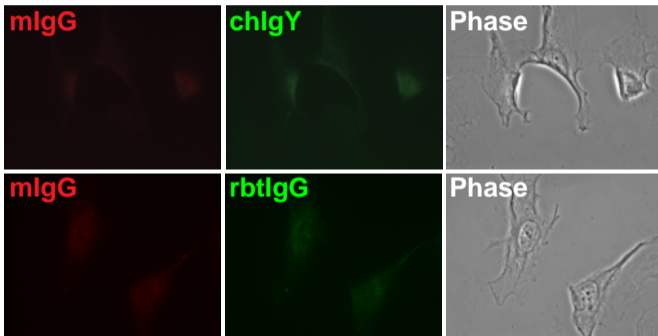

Supplement: jcs067645figs3.pdf [file jcs067645figs3.pdf]
